# Supplementary material for: Network Pharmacology-Guided Development of a Novel Integrative Regimen to Prevent Acute Graft-vs.-Host Disease
Source: PubMed Central journal article supplement (PMC6300759; doi:10.3389/fphar.2018.01440), 2018-12-13
Supplement: Image_3.pdf [file Image_3.pdf]

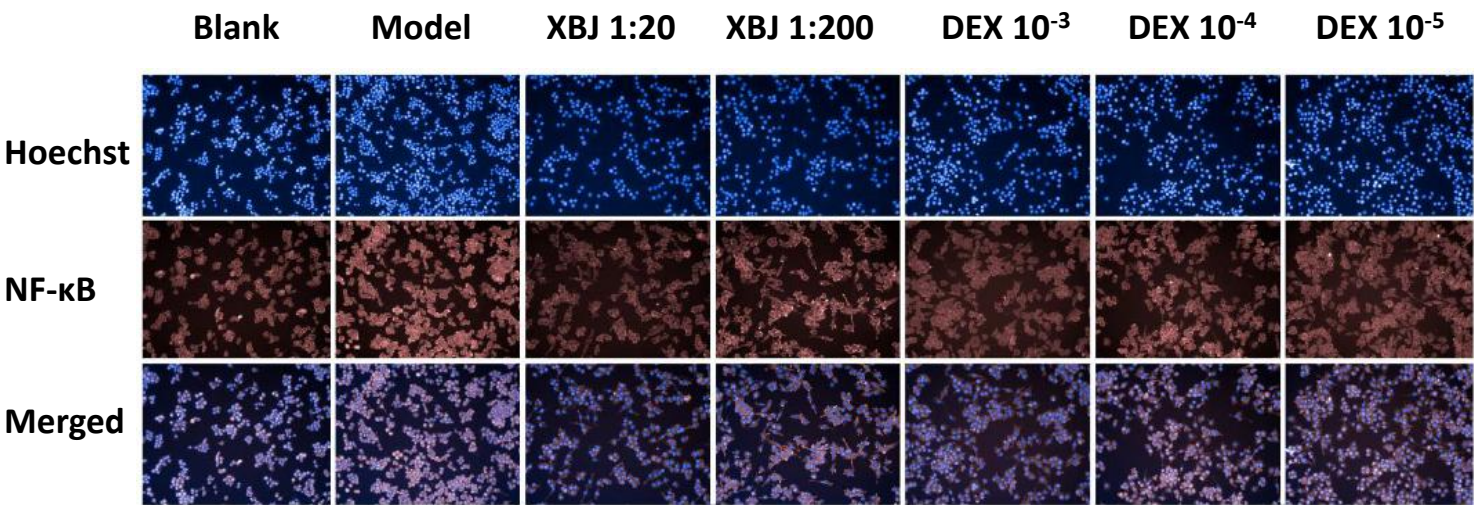

Supp. Fig. 3
